# Supplementary material for: Laboratory studies on the optical, physical, and chemical properties of fresh and aged biomass burning aerosols
Source: Copernicus journal article supplement (doi:10.5194/egusphere-2025-1020), 2025-04-25
Supplement: Supplementary file [file egusphere-2025-1020-AC1-supplement.pdf]

## **Reviewer #1**

### **General Comments:**

The authors have addressed all of my previous comments. I recommend the paper for publication in its current form.

Thank you for your previous suggestions, which are very helpful to improve the coherence, clarity and scientific rigor of the manuscript. Thank you again for your support to us.
